# Supplementary material for: Introducing alkyl chains to realize the construction of superhydrophobic/superoleophilic MOFs and the transformation from three-dimensional to two-dimensional structure
Source: Royal Society of Chemistry journal article supplement (doi:10.1039/d3qi02250a), 2023-12-29
Supplement: d3qi02250a1.pdf [file d3qi02250a1.pdf]

## Supplementary Information

### **Introducing Alkyl Chains to Realize the Construction of Superhydrophobic/Superoleophilic MOFs and the Transformation from Three-Dimensional to Two-Dimensional Structure**

*Xinglei He, Chunlong Yu, Jingheng Li, Zhihua Wang, Ke-Yin Ye\**

Key Laboratory of Molecule Synthesis and Function Discovery (Fujian Province University), College of Chemistry, Fuzhou University, Fuzhou 350108, China

E-mail: [kyye@fzu.edu.cn](mailto:kyye@fzu.edu.cn)

# Content

|       |                                                                                     |     |
|-------|-------------------------------------------------------------------------------------|-----|
| SI-1  | Experimental section .....                                                          | S3  |
| SI-2  | Crystal data and structure refinement details .....                                 | S8  |
| SI-3  | N <sub>2</sub> adsorption data .....                                                | S9  |
| SI-4  | Elemental analyses by EDS.....                                                      | S10 |
| SI-5  | Structure and characterization .....                                                | S11 |
| SI-6  | Stability analysis.....                                                             | S13 |
| SI-7  | Component analyses of <b>1-Rs</b> and <b>2-Rs</b> .....                             | S15 |
| SI-8  | Study on hydrophobicity of <b>1-Rs</b> .....                                        | S17 |
| SI-9  | Synthesis and characterization of small size <b>1-Oct</b> ( <b>s1-Oct</b> ).....    | S18 |
| SI-10 | Analysis of <b>1-Oct</b> load in PDMS/ <b>1-Oct@MS</b> .....                        | S18 |
| SI-11 | Morphology characterization and composition analysis of PDMS/ <b>1-Oct@MS</b> ..... | S20 |
| SI-12 | Oil-water separation experiment .....                                               | S22 |
| SI-13 | The influence of functional groups on the N <sub>2</sub> adsorption.....            | S23 |
| SI-14 | <sup>1</sup> H NMR spectra .....                                                    | S24 |
| SI-15 | References .....                                                                    | S28 |

## SI-1 Experimental section

### Synthesis of CuL<sup>s</sup>

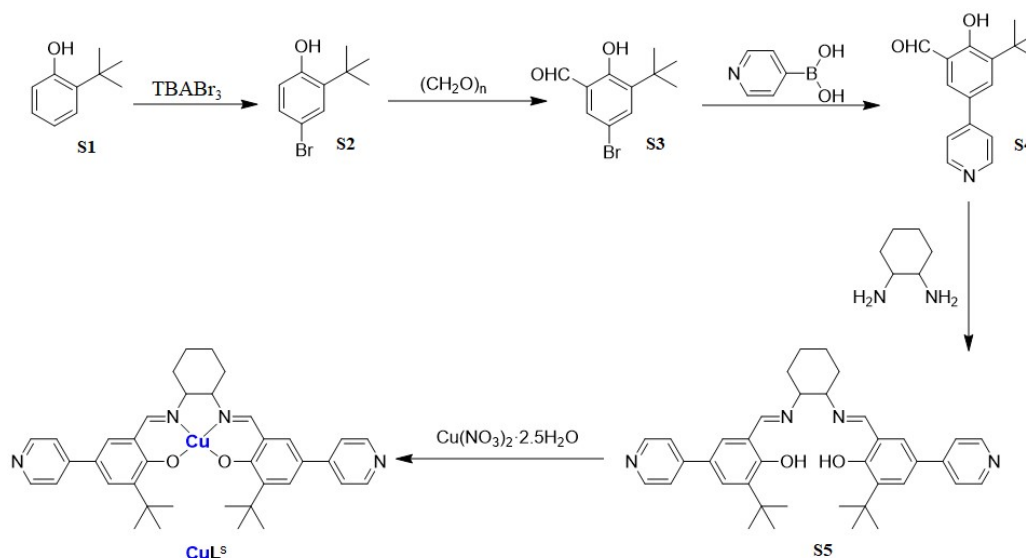

**Scheme S1** Schematic diagram of synthesis of CuL<sup>s</sup>.

#### Synthesis of S2 (4-Bromo-2-tert-butylphenol)

S2 was synthesized according to the literature,<sup>1</sup> but slightly modified. S1 (3.75 g, 25 mmol) was dissolved in dichloromethane (200 mL). Tetra-*n*-butyl ammonium tribromide (TBABr<sub>3</sub>, 14.47 g, 30 mmol) was slowly added and the solution was stirred for 3 h at room temperature. The solvent was removed by rotary evaporation and the crude product was partitioned between ethyl acetate and water. The ethyl acetate (EA) layer was washed sequentially with 1 M HCl (2 × 30 mL) and brine (2 × 30 mL). The organic layer was separated and dried over Na<sub>2</sub>SO<sub>4</sub>. The solvent was evaporated and the crude product was purified by chromatography on silica gel to afford clear yellow oil. Yield: 5.20 g (90.8 %). <sup>1</sup>H NMR (400 MHz, Chloroform-*d*, δ): 7.37 (s, 1H, Ar H), 7.17 (dd, *J* = 8.4, 2.5 Hz, 1H Ar H), 6.56 (d, *J* = 8.4 Hz, 1H, Ar H), 5.19-5.06 (m, OH), 1.40 (s, 9H, *t*-Bu).

#### Synthesis of S3 (5-bromo-3-(tert-butyl)-2-hydroxybenzaldehyde)

S3 was synthesized according to the literature.<sup>2</sup> In a dry two-necked flask, a solution of S2 (15.2 g, 66.3 mmol), MgCl<sub>2</sub> (21.0 g, 221 mmol), and Et<sub>3</sub>N (55 mL) in 174 ml of anhydrous CH<sub>3</sub>CN were

stirred at room temperature for 30 minutes. Then, 22.3 g (791 mmol) of paraformaldehyde was added and the reaction mixture was stirred at 85 °C for 4 h. After cooling at room temperature, the mixture was diluted with EA (100 mL) and washed with HCl 1M (3 x 50 mL), H<sub>2</sub>O (3 x 50 mL), brine (3 x 50 mL). The organic phase was dried over Na<sub>2</sub>SO<sub>4</sub> and filtered. The crude was purified by chromatographic column on flash silica gel. Yield: 12.35 g (72.1 %). <sup>1</sup>H NMR (400 MHz, Chloroform-d, δ): 11.72 (s, 1H, OH), 9.81 (s, 1H, CHO), 7.58 (d, J = 2.5 Hz, 1H, Ar H), 7.51 (d, J = 2.5 Hz, 1H, Ar H), 1.40 (s, 9H, *t*-Bu).

#### Synthesis of **S4** (3-*tert*-butyl-5-(4-pyridyl)-2-hydroxybenzaldehyde)

**S4** was synthesized according to the literature.<sup>3</sup> A mixture of **S3** (2.5 g, 9.72 mmol), 4-pyridinylboronic acid (1.31 g, 10.69 mmol), Na<sub>2</sub>CO<sub>3</sub> (1.55 g, 14.58 mmol), and Pd(PPh<sub>3</sub>)<sub>4</sub> (1.13 g, 0.98 mmol) was refluxed in 1,4-dioxane and H<sub>2</sub>O (3:1 v/v, 60 mL, degassed with N<sub>2</sub>) at 102 °C for 1 h. After cooling to room temperature, the reaction contents were poured into water (50 mL). The aqueous mixture was extracted with CH<sub>2</sub>Cl<sub>2</sub> (50 mL), and the combined extracts were dried over Na<sub>2</sub>SO<sub>4</sub> before being concentrated under reduced pressure. The crude was purified by chromatographic column on flash silica gel to afford a pale yellow solid. Yield: 1.23 g (53.2 %). <sup>1</sup>H NMR (400 MHz, Chloroform-d, δ): 11.94 (s, 1H, OH), 9.98 (s, 1H, CHO), 8.66 (d, J = 5.5 Hz, 2H, Ar H), 7.80 (d, J = 2.3 Hz, 1H, Ar H), 7.69 (d, J = 2.4 Hz, 1H, Ar H), 7.53-7.48 (m, 2H, Ar H), 1.48 (s, 9H, *t*-Bu).

#### Synthesis of **S5** (3,3'-Diaminocyclohexanediylbis(nitromethylidene)bis [3-*tert*-Butyl-2-hydroxy-5-(4-pyridinyl)-benzaldehyde])

**S5** was synthesized according to the literature.<sup>3</sup> **S4** (3.92 g, 15.4 mmol) was dissolved in methanol (50 mL). A solution of (1,2)-diaminocyclohexane (860 mg, 7.58 mmol) in methanol (10 mL) was added dropwise and the solution turned bright yellow. The solvent was evaporated. The crude compound

was purified by flash chromatography on silica gel with EA to get a yellow solid. Yield: 3.48 g (78.1 %) <sup>1</sup>H NMR (400 MHz, Chloroform-d) δ 14.18 (s, 2H, OH), 8.61-8.53 (m, 4H, Ar H), 8.36 (s, 2H, CHO), 7.51 (d, J = 2.3 Hz, 2H, Ar H), 7.38-7.32 (m, 4H, Ar H), 7.27 (d, J = 1.9 Hz, 2H, Ar H), 3.44-3.36 (m, 2H, CH), 1.97-1.92 (m, 2H, CH<sub>2</sub>), 1.89-1.82 (m, 2H, CH<sub>2</sub>), 1.83-1.74 (m, 2H, CH<sub>2</sub>), 1.56-1.50 (m, 2H, CH<sub>2</sub>), 1.44 (s, 18H, *t*-Bu).

### Synthesis of **CuL<sup>s</sup>**

A solution of **S5** (588 mg, 1 mmol) in MeOH (20 mL) was added dropwise to Cu(NO<sub>3</sub>)<sub>2</sub>·2.5H<sub>2</sub>O (232.6 mg, 1 mmol) in MeOH (5 mL). The reaction mixture was stirred at 60 °C for 3 h. The dark purple powder precipitate of **CuL<sup>s</sup>** was collected by filtration, washed with MeOH, and dried under reduced pressure. Yield: 0.60 g (92.2 %).

### Synthesis of **H<sub>2</sub>L-Rs** (R = ethyl, n-butyl, n-hexyl, n-octyl)

**H<sub>2</sub>L-Rs** was synthesized according to the literature.<sup>4</sup>

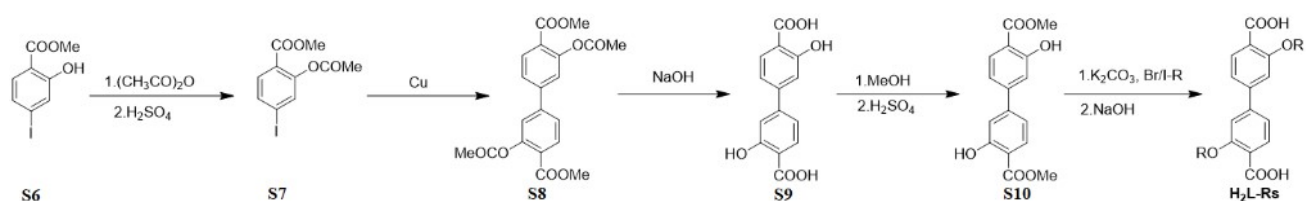

**Scheme S2.** Schematic diagram of synthesis of **H<sub>2</sub>L-Rs**.

### Synthesis of **S7** (methyl 2-acetoxy-4-iodobenzoate)

Concentrated H<sub>2</sub>SO<sub>4</sub> (85 μL) was added to **S6** (methyl 2-hydroxy-4-iodobenzoate) (2.0 g, 7.2 mmol) in acetic anhydride (3 mL) and the mixture was stirred at 80 °C overnight. After cooling to room temperature, water (15 mL) was added and the solution was extracted with CH<sub>2</sub>Cl<sub>2</sub> (2 × 50 mL). The combined organic extracts were passed through a plug of silica and washed with saturated NaHCO<sub>3</sub> solution, dried over Na<sub>2</sub>SO<sub>4</sub>, filtered and the solvents removed in vacuo to give a white solid.

#### Synthesis of **S8** (dimethyl 3,3'-diacetoxy-[1,1'-biphenyl]-4,4'-dicarboxylate)

**S7** (1.60 g, 13.70 mmol), copper powder (3.00 g, 46.0 mmol), and DMF (4 mL) were mixed under N<sub>2</sub> atmosphere and then heated to 155 °C for 10 h. After the reaction mixture was filtered while it was still hot, the filtrate was collected, poured into water (40 mL), and stirred vigorously. The formed precipitate was collected by filtration and dried under reduced pressure at 60 °C overnight to afford a white solid.

#### Synthesis of **S9** (3,3'-dihydroxy-[1,1'-biphenyl]-4,4'-dicarboxylic acid)

**S8** (1.16 g, 3 mmol) was dissolved in a mixed solution of methanol (30 mL) and THF (tetrahydrofuran 30 mL), then added to a 100 mL one-neck flask equipped with a condenser and a magnetic stirrer. After that 6 mL 2 M NaOH solution was added drop by drop, and the reaction mixture was refluxed overnight. After cooling to room temperature, the reaction mixture was concentrated in vacuo to remove some organic solvent. 50 mL water was added to the residue, the aqueous layer was acidified with concentrated HCl until a pH < 3 was attained and the resulting precipitate was collected by filtration, washed with ample H<sub>2</sub>O, and dried to obtain a white powder.

#### Synthesis of **S10** (dimethyl 3,3'-dihydroxy-[1,1'-biphenyl]-4,4'-dicarboxylate)

**S9** (0.55 g, 2 mmol) was dissolved in methanol (40 mL) and added to a 100 mL one-neck flask equipped with a condenser and a magnetic stirrer. After that 800 uL concentrated H<sub>2</sub>SO<sub>4</sub> was added drop by drop, and the reaction mixture was refluxed 24 h. After cooling to room temperature, the reaction mixture was concentrated in vacuo to remove MeOH. 50 mL water was added to the residue after the solution was filtered, the precipitate was dried under vacuum and a white powder was obtained.

#### Synthesis of **H<sub>2</sub>L-Rs**

**S10** (302 mg, 1 mmol), K<sub>2</sub>CO<sub>3</sub> (276 mg, 2 mmol), and DMF (5 mL) were added to a 50 mL one-neck

flask equipped with a condenser and a magnetic stirrer, Br-R (R = ethyl, n-butyl, n-hexyl, n-octyl) (2.5 mmol) was added dropwise to the mixture. The reaction mixture was heated at 85 °C for 3 h. After cooling to room temperature, the reaction mixture was concentrated in vacuo to remove DMF. After that, a mixed solution of methanol (10 mL) and THF (10 mL) was added, and 2 mL 2 M NaOH solution was added drop by drop to the reaction mixture and refluxed overnight. After cooling to room temperature, the reaction mixture was concentrated in vacuo to remove organic solvent. Water (50 mL) was added to the residue, the aqueous layer was acidified with concentrated HCl until a pH < 3 was attained and the resulting precipitate was collected by filtration, washed with ample H<sub>2</sub>O, and vacuum-dried to obtain a white powder.

## SI-2 Crystal data and structure refinement details

**Tab. S1** Crystal data and structure refinement details of **1**, **2**, and **1-Oct**.

| Complex                                         | <b>1</b>                                                          | <b>2</b>                                                          | <b>1-Oct</b>                                                                                     |
|-------------------------------------------------|-------------------------------------------------------------------|-------------------------------------------------------------------|--------------------------------------------------------------------------------------------------|
| Formula                                         | C <sub>52</sub> H <sub>50</sub> CdCuN <sub>4</sub> O <sub>6</sub> | C <sub>55</sub> H <sub>56</sub> CuZnN <sub>5</sub> O <sub>7</sub> | C <sub>128</sub> H <sub>147</sub> Cd <sub>2</sub> Cu <sub>2</sub> N <sub>8</sub> O <sub>16</sub> |
| formula weight, fw                              | 1002.90                                                           | 1027.95                                                           | 2405.41                                                                                          |
| Temperature, <i>T</i> [K]                       | 296.15(10)                                                        | 296.15                                                            | 293.15                                                                                           |
| crystal system                                  | <i>orthorhombic</i>                                               | <i>orthorhombic</i>                                               | <i>triclinic</i>                                                                                 |
| space group                                     | <i>Pbca</i>                                                       | <i>Pbca</i>                                                       | <i>P1</i>                                                                                        |
| a [Å]                                           | 26.966(2)                                                         | 13.7150(6)                                                        | 11.2898(9)                                                                                       |
| b [Å]                                           | 13.9127(10)                                                       | 25.9845(8)                                                        | 13.6418(11)                                                                                      |
| c [Å]                                           | 26.3405(14)                                                       | 26.6380(11)                                                       | 23.3580(19)                                                                                      |
| α [°]                                           | 90                                                                | 90                                                                | 103.862(7)                                                                                       |
| β [°]                                           | 90                                                                | 90                                                                | 97.472(7)                                                                                        |
| γ [°]                                           | 90                                                                | 90                                                                | 104.800(7)                                                                                       |
| V [Å <sup>3</sup> ]                             | 9882.3(12)                                                        | 9493.2(6)                                                         | 3306.0(5)                                                                                        |
| Z                                               | 8                                                                 | 8                                                                 | 1                                                                                                |
| ρ [g cm <sup>-3</sup> ]                         | 1.348                                                             | 1.438                                                             | 1.208                                                                                            |
| μ [mm <sup>-1</sup> ]                           | 0.912                                                             | 1.014                                                             | 0.695                                                                                            |
| θ range                                         | 2.1540-18.8990                                                    | 2.291-24.438                                                      | 2.7450-22.2700                                                                                   |
| F(000)                                          | 4120                                                              | 4288                                                              | 1253                                                                                             |
| goodness-of-fit, GOF                            | 0.990                                                             | 1.144                                                             | 1.032                                                                                            |
| <i>R</i> <sub>1</sub> <sup>a</sup> [I > 2σ (I)] | 0.0601                                                            | 0.0759                                                            | 0.1169                                                                                           |
| w <i>R</i> <sub>2</sub> <sup>b</sup> (all data) | 0.1569                                                            | 0.2264                                                            | 0.2835                                                                                           |

$$^aR_1 = \frac{\sum ||F_o| - |F_c||}{\sum |F_o|}, \quad ^b wR_2 = \frac{[\sum w(|F_o|^2 - |F_c|^2)^2]}{\sum w|F_o|^2}]^{1/2}.$$

SC-XRD of **1**, **2**, and **1-Oct** were tested on a Bruker D8 Venture using Mo K $\alpha$  radiation. The empirical absorption correction was performed using the Crystal Clear program. The structure was solved by direct methods and refined on  $F^2$  by the full-matrix least-squares technique using the SHELXL program package. Table S1 shows the refinement details of **1**, **2**, and **1-Oct**.



### SI-3 N<sub>2</sub> adsorption data

**Tab. S2** BET surface area, pore volume and porosity of **1**, **2**, **1-NH<sub>2</sub>**, **1-Et**, and **1-Oct**.

| Sample                  | $S_{\text{BET}}$ (m <sup>2</sup> g <sup>-1</sup> ) | $V_t$ (cc g <sup>-1</sup> ) | $P$ (%) |
|-------------------------|----------------------------------------------------|-----------------------------|---------|
| <b>1</b>                | 94.812                                             | 133.8184                    | 16.5    |
| <b>2</b>                | 23.154                                             | 81.8093                     | 16.1    |
| <b>1-NH<sub>2</sub></b> | 0.913                                              | 2.7987                      |         |
| <b>1-Et</b>             | 189.174                                            | 52.8486                     |         |
| <b>1-Oct</b>            | 4.392                                              | 2.7678                      | 13.1    |

$S_{\text{BET}}$  is the BET surface area.  $V_t$  stands for the single point total pore volume determined by using the adsorption branch of the N<sub>2</sub> isotherm at  $P/P_0 = 0.99$ .  $P$  stands for porosity calculated by the PLATON program.

## SI-4 Elemental analyses by EDS

**Tab. S3** Elemental analyses by EDS of PDMS/1-Oct@MS.

| <b>Element</b> | <b>Intensity (c/s)</b> | <b>Conc.</b> | <b>Units</b> |
|----------------|------------------------|--------------|--------------|
| C              | 830.73                 | 30.809       | wt. %        |
| N              | 208.32                 | 17.179       | wt. %        |
| O              | 599.11                 | 26.106       | wt. %        |
| Si             | 2,404.29               | 20.661       | wt. %        |
| Cu             | 19.91                  | 1.878        | wt. %        |
| Cd             | 69.32                  | 3.367        | wt. %        |

**Tab. S4** Elemental analyses by EDS of PDMS/1-Oct@MS after 50 cycles.

| <b>Element</b> | <b>Intensity (c/s)</b> | <b>Conc.</b> | <b>Units</b> |
|----------------|------------------------|--------------|--------------|
| C              | 1,270.12               | 29.786       | wt. %        |
| N              | 403.36                 | 23.454       | wt. %        |
| O              | 822.25                 | 29.011       | wt. %        |
| Si             | 2,262.88               | 14.902       | wt. %        |
| Cu             | 23.98                  | 1.731        | wt. %        |
| Cd             | 30.51                  | 1.116        | wt. %        |

## SI-5 Structure and characterization

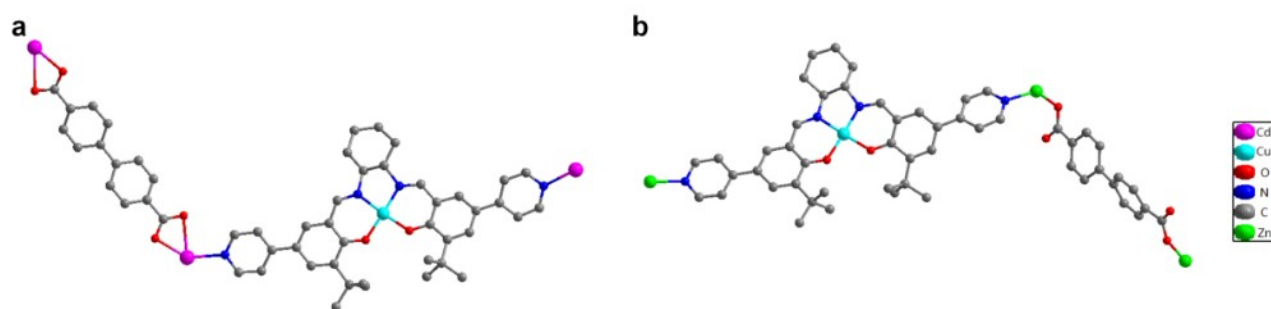

Fig. S1 Asymmetric units of 1 and 2.

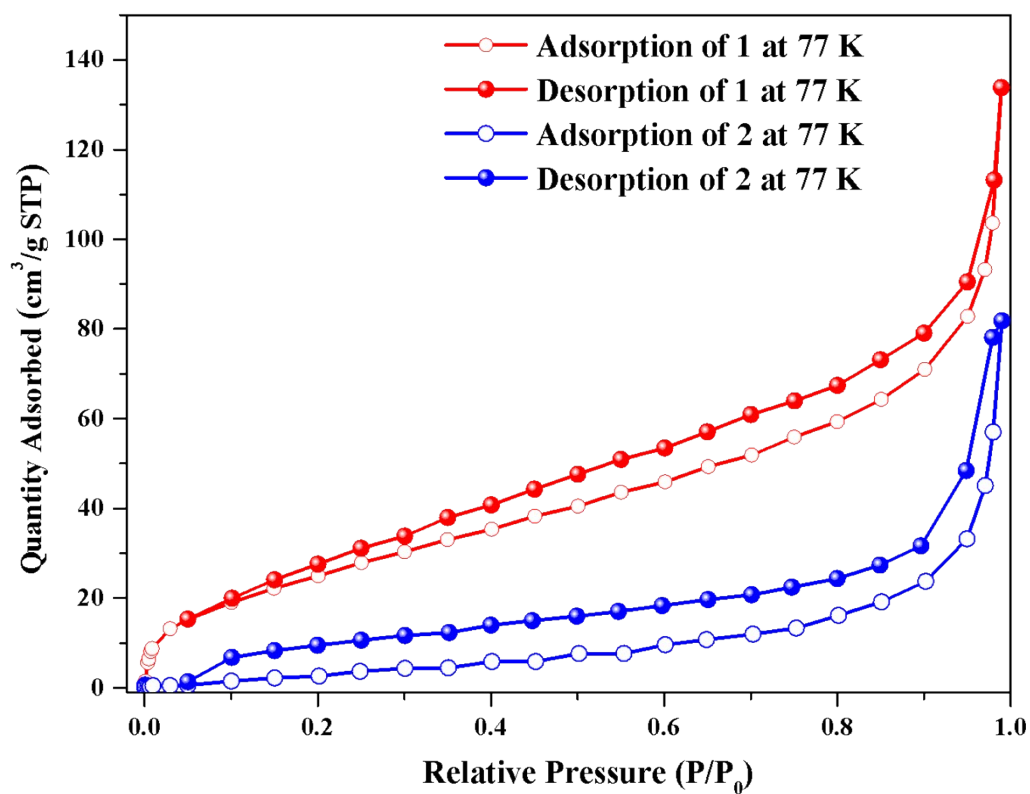

Fig. S2 N<sub>2</sub> adsorption-desorption isotherms of 1 and 2.

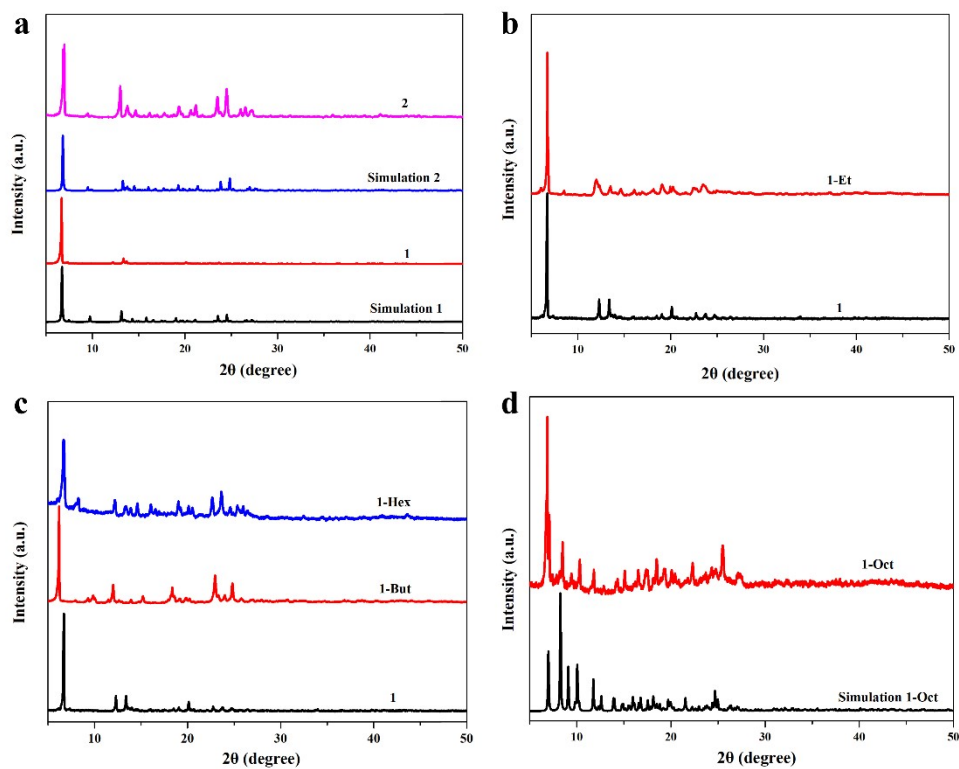

**Fig. S3** PXRD patterns of **1** and **2** (a), **1-Et** (b), **1-But** and **1-Hex** (c), and **1-Oct** (d).

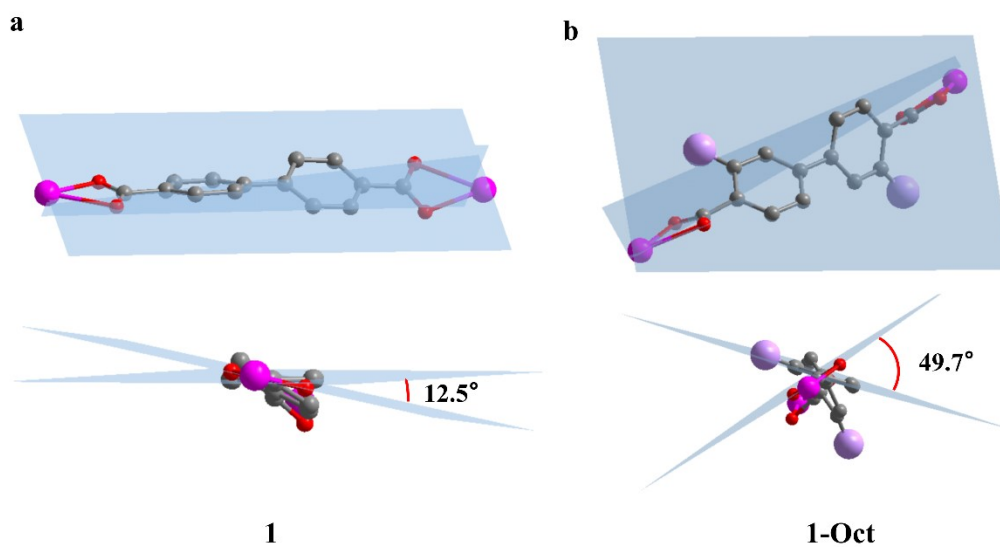

**Fig. S4** The dihedral angle formed by a carboxyl group and the connected benzene ring in **1**(a) and **1-Oct** (b).

## SI-6 Stability analysis

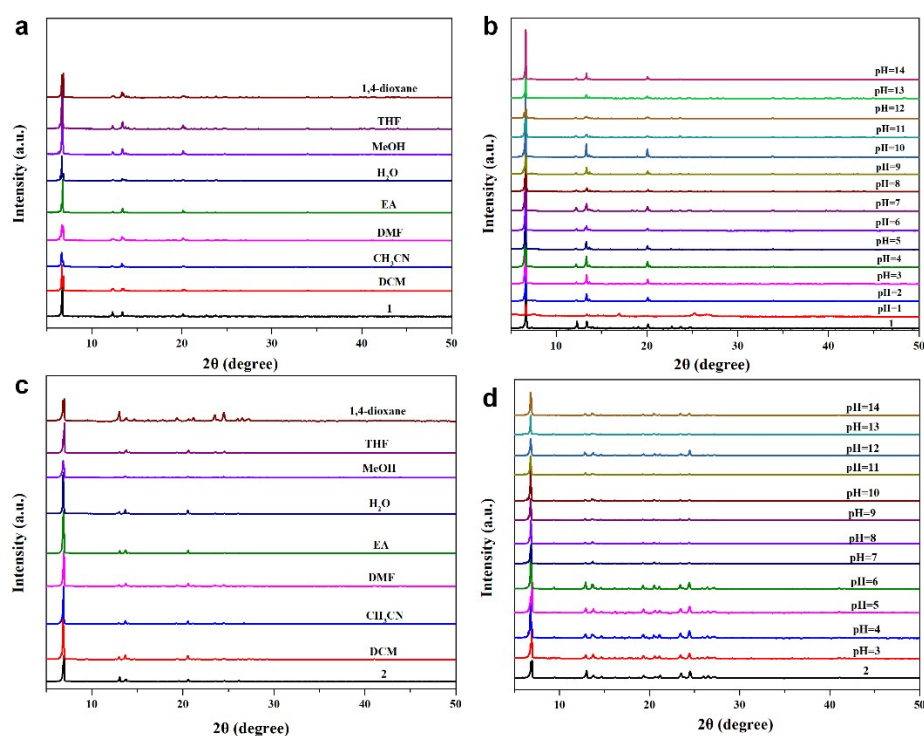

**Fig. S5** (a) PXRD patterns after soaking **1** in different solvents (dichloromethane (DCM), acetonitrile (CH<sub>3</sub>CN), DMF, ethyl acetate (EA), H<sub>2</sub>O, methanol (MeOH), tetrahydrofuran (THF), 1,4-dioxane) for 60 days. (b) PXRD patterns after soaking **1** in aqueous solutions of different pH for 48 hours. (c) PXRD patterns after soaking **2** in different solvents for 60 days. (d) PXRD patterns after soaking **2** in aqueous solutions of different pH for 48 hours.

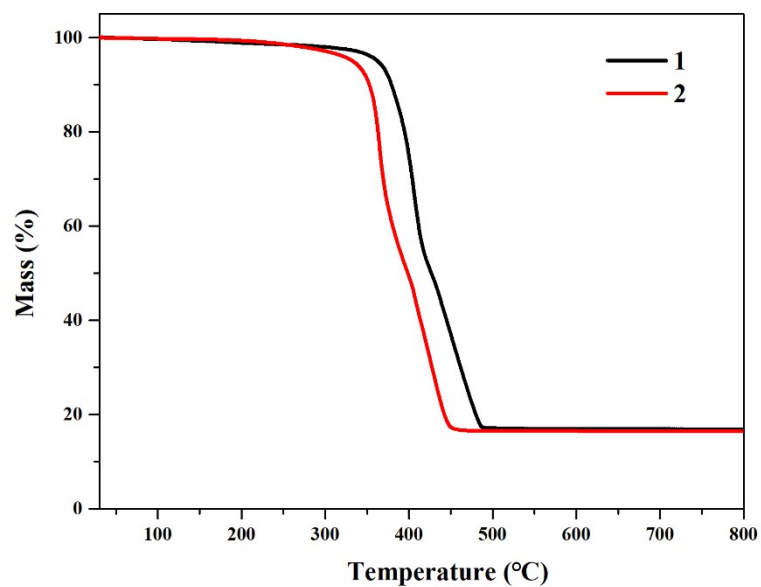

**Fig. S6** The thermogravimetric analyses of **1** and **2**.

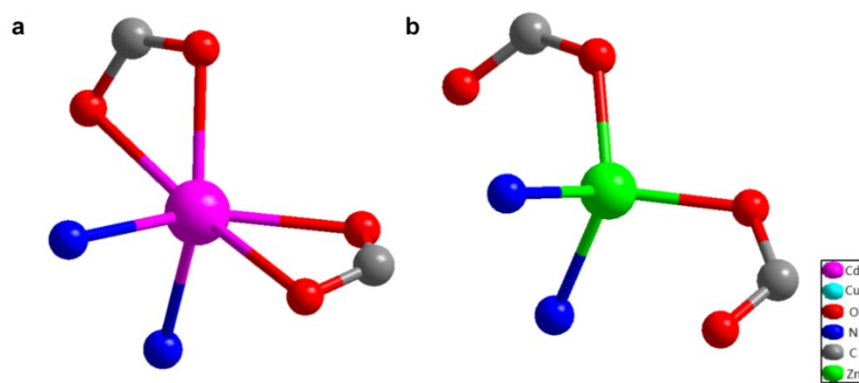

**Fig. S7** Coordination modes of metal atoms in the secondary building units (SBUs) of **1** (a) and **2** (b).

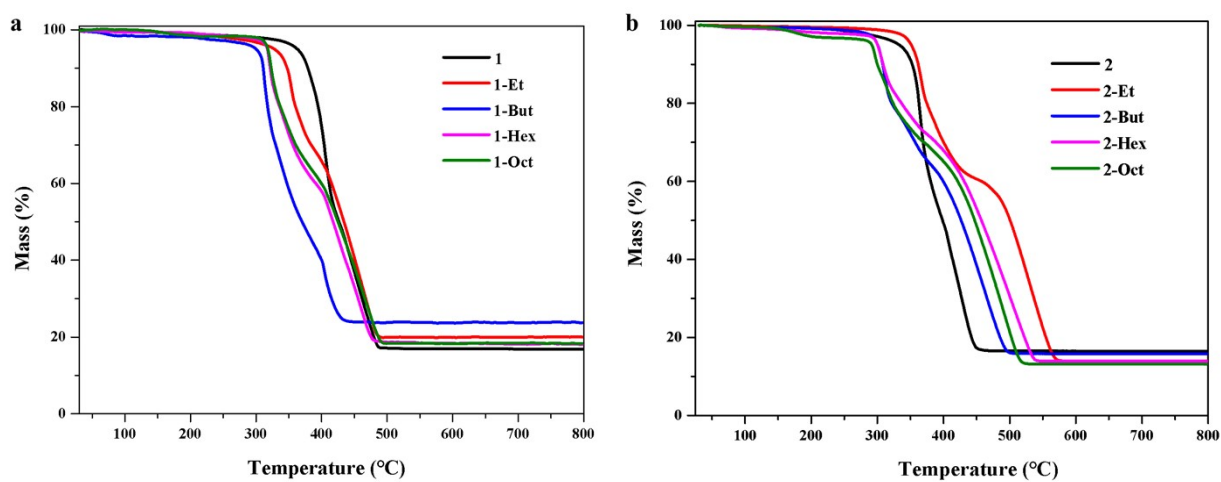

**Fig. S8** The thermogravimetric analyses of **1-Rs** (a) and **2-Rs** (b).

## SI-7 Component analyses of 1-Rs and 2-Rs

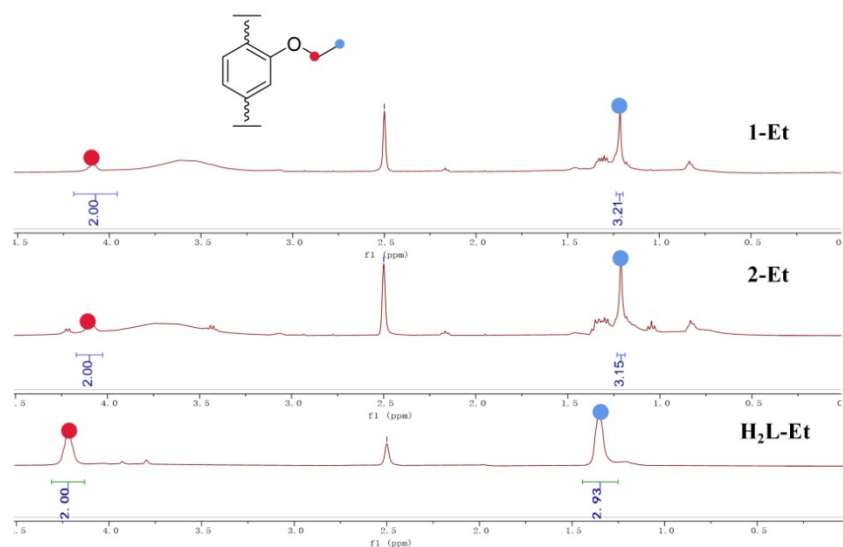

**Fig. S9** The <sup>1</sup>H NMR spectra of digested **1-Et**, **2-Et** and **H<sub>2</sub>L-Et**.

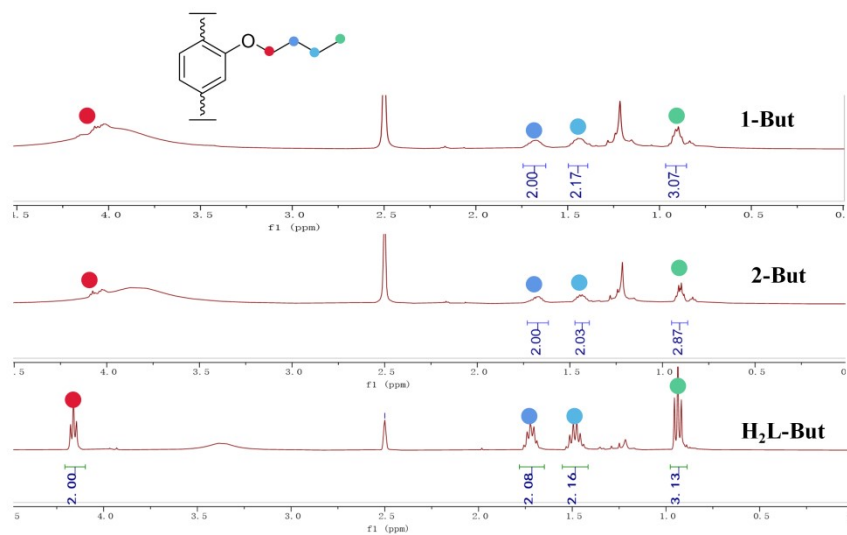

**Fig. S10** The <sup>1</sup>H NMR spectra of digested **1-But**, **2-But** and **H<sub>2</sub>L-But**.

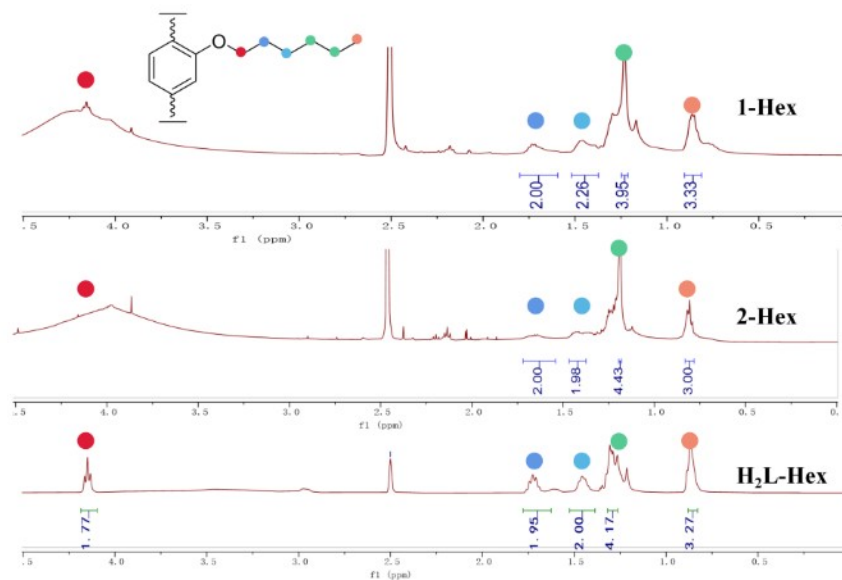

**Fig. S11** The  $^1\text{H}$  NMR spectra of digested **1-Hex**, **2-Hex** and **H<sub>2</sub>L-Hex**.

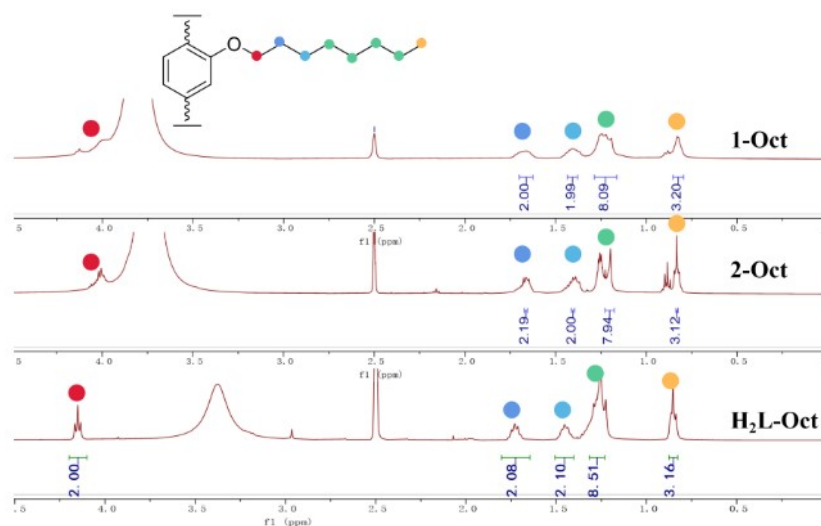

**Fig. S12** The  $^1\text{H}$  NMR spectra of digested **1-Oct**, **2-Oct** and **H<sub>2</sub>L-Oct**.

Digested process: 100 mg **1-Rs** and **2-Rs** were added to 10 mL aqua regia ( $V_{\text{HCl(Conc.)}} : V_{\text{HNO}_3(\text{Conc.})}$ ) by ultrasound for 10 minutes. Then the mixed solution was extracted with ethyl acetate ( $20 \times 3$  mL), the collected organic phase was washed with saturated salt water ( $20 \times 3$  mL), dried with anhydrous  $\text{Na}_2\text{SO}_4$ , concentrated in a vacuum, and white solids were collected.



## SI-8 Study on hydrophobicity of 1-Rs

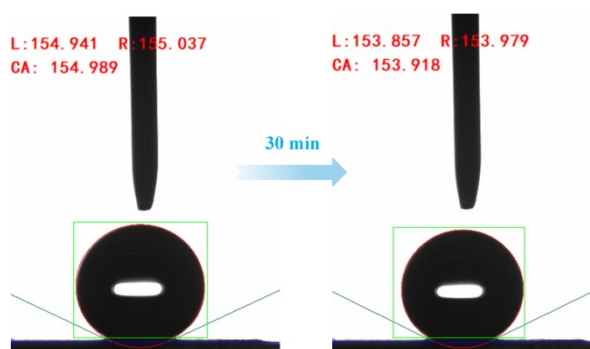

**Fig. S13** The WCAs of 1-Oct and 1-Oct after standing for 30 minutes.

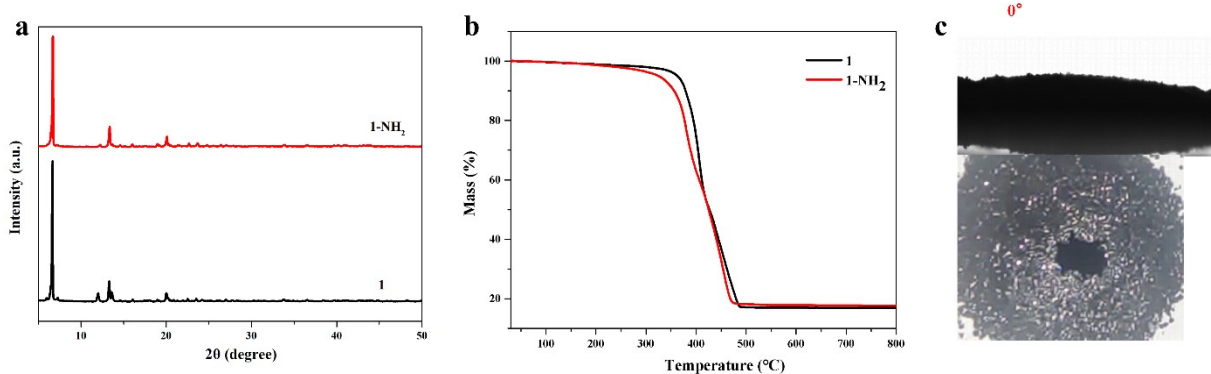

**Fig. S14** The PXRD patterns (a), thermogravimetric analyses (b), WCAs and digital photograph (c) of 1-NH<sub>2</sub>.

H<sub>2</sub>L-NH<sub>2</sub> (2-Amino-[1,1'-biphenyl]-4,4'-dicarboxylic acid) was obtained through commercial purchase replaced H<sub>2</sub>L as ligand to synthesize 1-NH<sub>2</sub>. The PXRD patterns demonstrate correct crystal structure and high phase purity of 1-NH<sub>2</sub>. The thermogravimetric analyses reflect the thermal stability of 1-NH<sub>2</sub>. The WCA shows the superhydrophilicity of 1-NH<sub>2</sub>.

## SI-9 Synthesis and characterization of small size 1-Oct (s1-Oct)

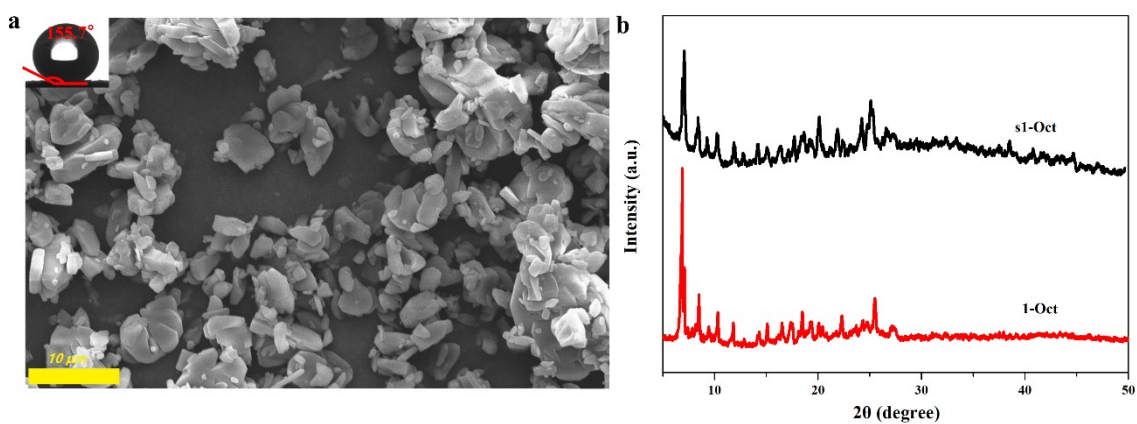

**Fig. S15** (a) The SEM and WCA images of s1-Oct. (b) The PXRD patterns of 1-Oct and s1-Oct.

## SI-10 Analysis of 1-Oct load in PDMS/1-Oct@MS

**Tab. S5** The average and standard deviation of MS of 1x1x1 cm<sup>3</sup> and coated MS of 1x1x1 cm<sup>3</sup> with PDMS or/and 1-Oct.

| Sample | Weight (mg) |             |          |       |             |       |           |          |                |          |             |
|--------|-------------|-------------|----------|-------|-------------|-------|-----------|----------|----------------|----------|-------------|
|        | $M_M$       | $\bar{x}_M$ | $M_{PM}$ | $M_P$ | $\bar{x}_P$ | $S_P$ | $M_{POM}$ | $M_{PO}$ | $\bar{x}_{PO}$ | $S_{PO}$ | $\bar{x}_O$ |
| 1      | 7.9         | 7.7         | 39.8     | 31.9  | 31.9        | 2.5   |           |          |                |          | 6.6         |
| 2      | 7.4         |             | 43.1     | 35.7  |             |       |           |          |                |          |             |
| 3      | 6.8         |             | 39.4     | 32.6  |             |       |           |          |                |          |             |
| 4      | 8.6         |             | 38.5     | 29.9  |             |       |           |          |                |          |             |
| 5      | 6.7         |             | 36.2     | 29.5  |             |       |           |          |                |          |             |
| 6      | 6.9         |             |          |       |             |       | 43.1      | 36.2     | 38.5           | 2.2      |             |
| 7      | 8.1         |             |          |       |             |       | 49.3      | 41.2     |                |          |             |
| 8      | 8.0         |             |          |       |             |       | 48.3      | 40.3     |                |          |             |
| 9      | 7.3         |             |          |       |             |       | 44.1      | 36.8     |                |          |             |
| 10     | 8.2         |             |          |       |             |       | 46.3      | 38.1     |                |          |             |

$M_M$ ,  $M_{PM}$ ,  $M_P$ ,  $M_{POM}$ , and  $M_{PO}$ , stand for the weight of MS, PDMS/MS, loaded PDMS, PDMS/1-Oct@MS, and loaded PDMS/1-Oct, respectively (mg).  $\bar{x}_M$ ,  $\bar{x}_P$ , and  $\bar{x}_{PO}$  are the averages of MS, loaded PDMS, and loaded PDMS/1-Oct, respectively (mg);  $S_P$  and  $S_{PO}$  stand for the standard deviation values of loaded PDMS and loaded PDMS/1-Oct, respectively;  $\bar{x}_O$  (mg) is obtained by subtracting  $\bar{x}_{PO}$  from  $\bar{x}_P$ .

$$\bar{x} = \frac{\sum_{i=1}^n x_i}{n} \quad (\text{Eq. 1})$$

$$S = \sqrt{\frac{1}{n} \sum_{i=1}^n (x_i - \bar{x})^2} \quad (\text{Eq. 2})$$

$\bar{x}$  is the average value (mg);  $S$  is the standard deviation value (%);  $n$  stands for total number of samples;  $i$  stands for serial number of samples.

# SI-11 Morphology characterization and composition analysis of PDMS/1-Oct@MS

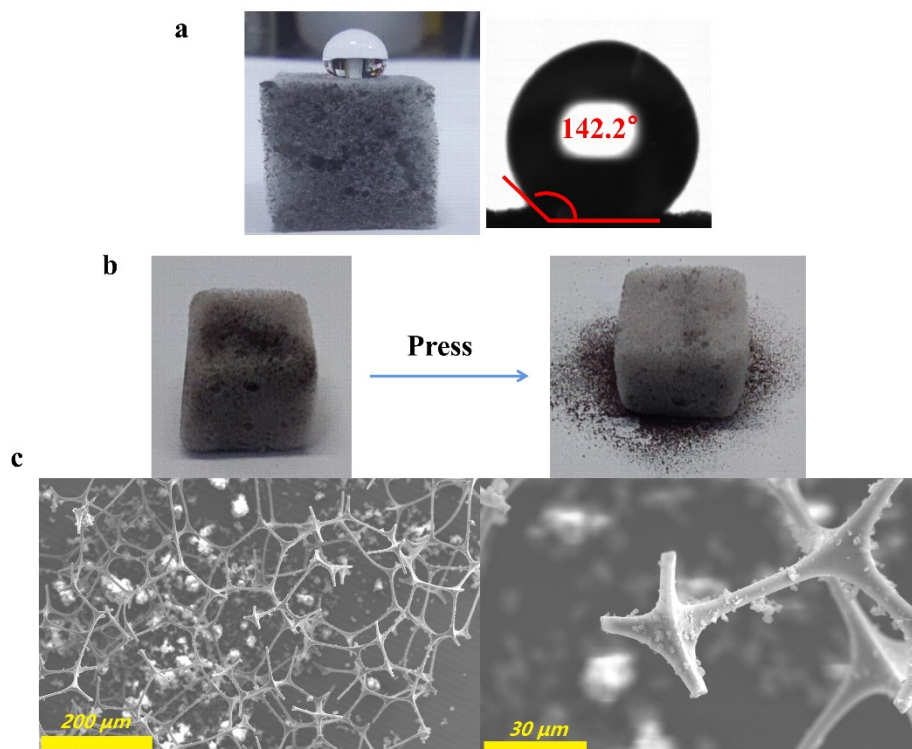

**Fig. S16** (a) The hydrophobicity analysis of 1-Oct@MS. (b) The shedding of 1-Oct in 1-Oct@MS after pressing. (c) The SEM images of 1-Oct@MS.

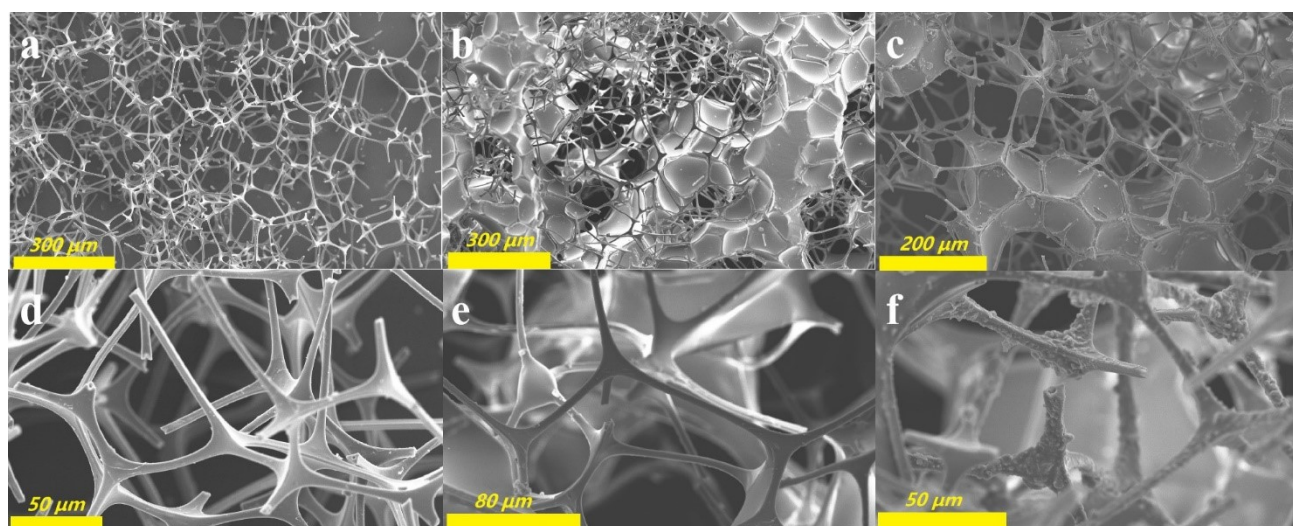

**Fig. S17** The SEM images of MS (a and d), PDMS/MS (b and e), and PDMS/1-Oct@MS (c and f).

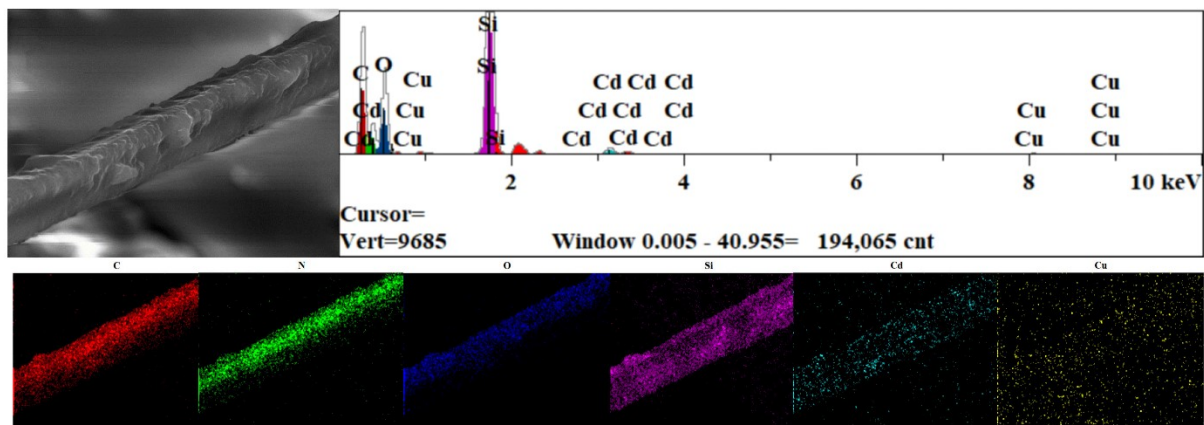

**Fig. S18** EDS-mapping images of PDMS/1-Oct@MS.

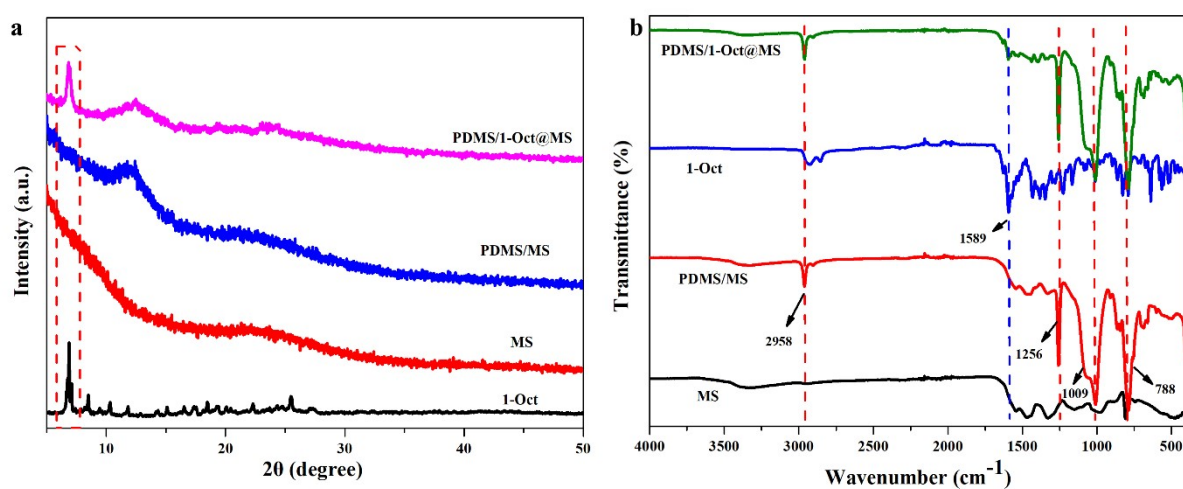

**Fig. S19** The PXRD patterns (a) and FTIR spectra (b) of 1-Oct, MS, PDMS/MS, and PDMS/1-Oct@MS.

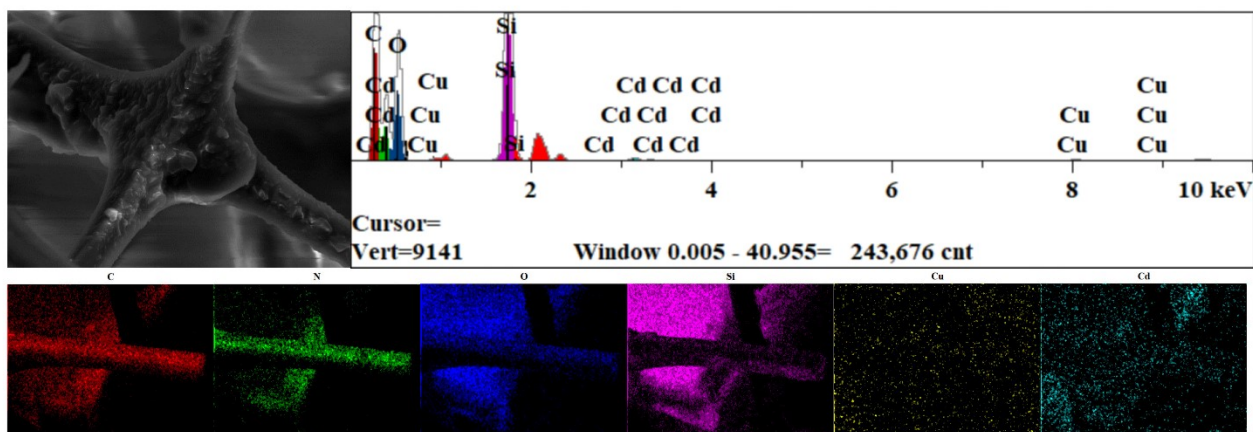

**Fig. S20** EDS-mapping images of PDMS/1-Oct@MS after 50 cycles.

## SI-12 Oil-water separation experiment

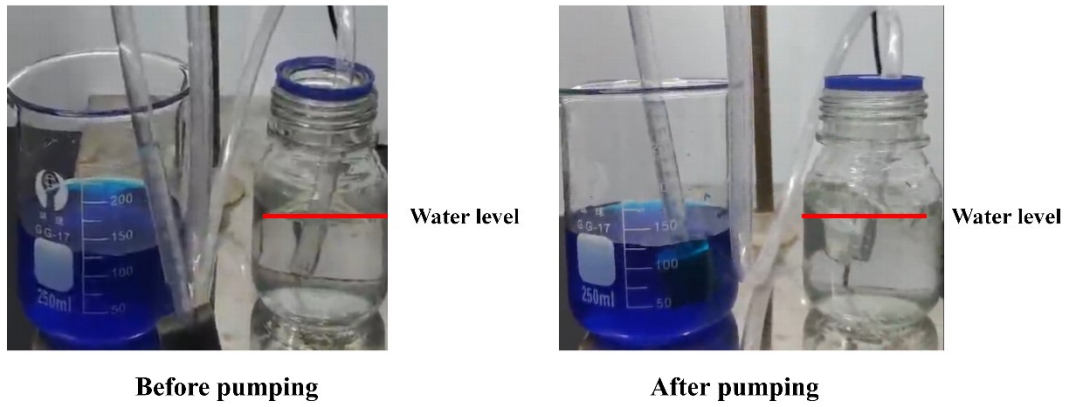

**Fig. 21** Water level of outlet before and after pumping.

### SI-13 The influence of functional groups on the N<sub>2</sub> adsorption

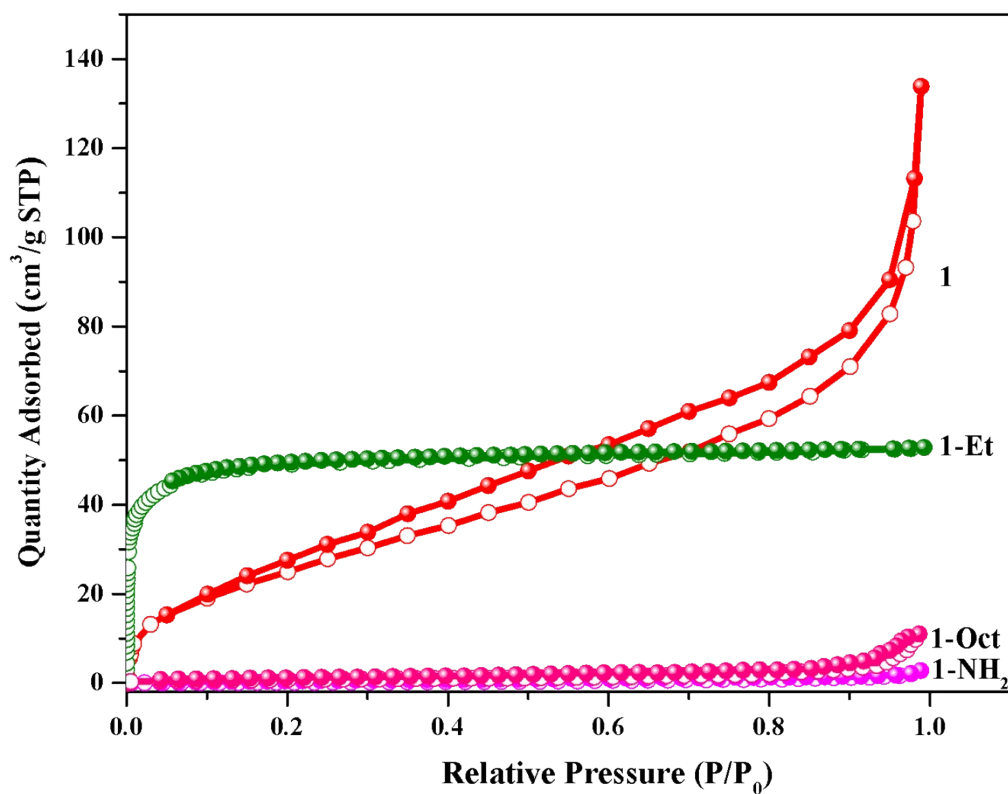

**Fig. S22** N<sub>2</sub> adsorption-desorption isotherms of **1**, **1-NH<sub>2</sub>**, **1-Et**, and **1-Oct** at 77 K (The hollow sphere stands for adsorption and the solid sphere stands for desorption).

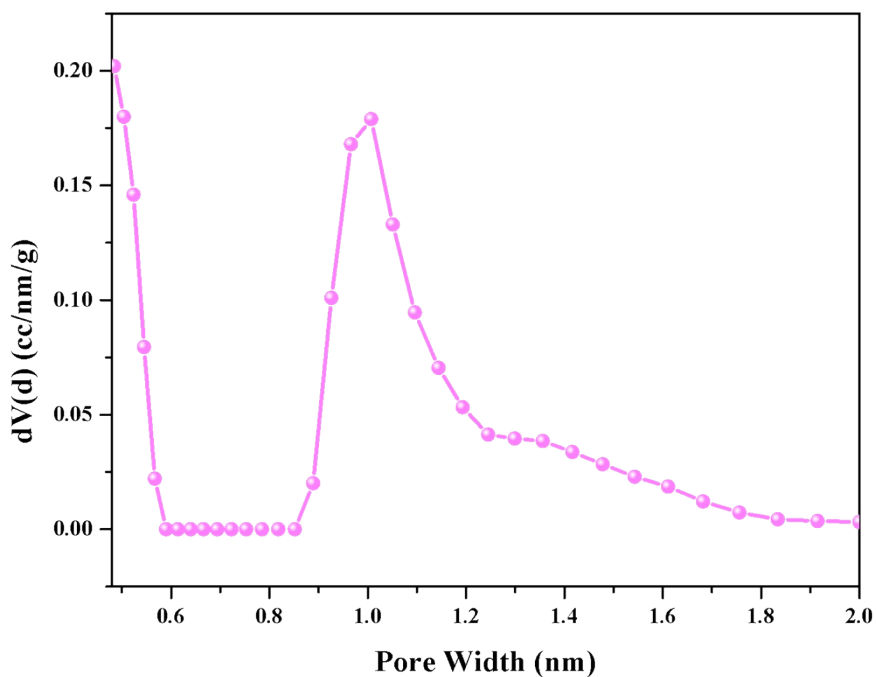

**Fig. S23** Pore size distribution of **1-Et**.

# SI-14 <sup>1</sup>H NMR spectra

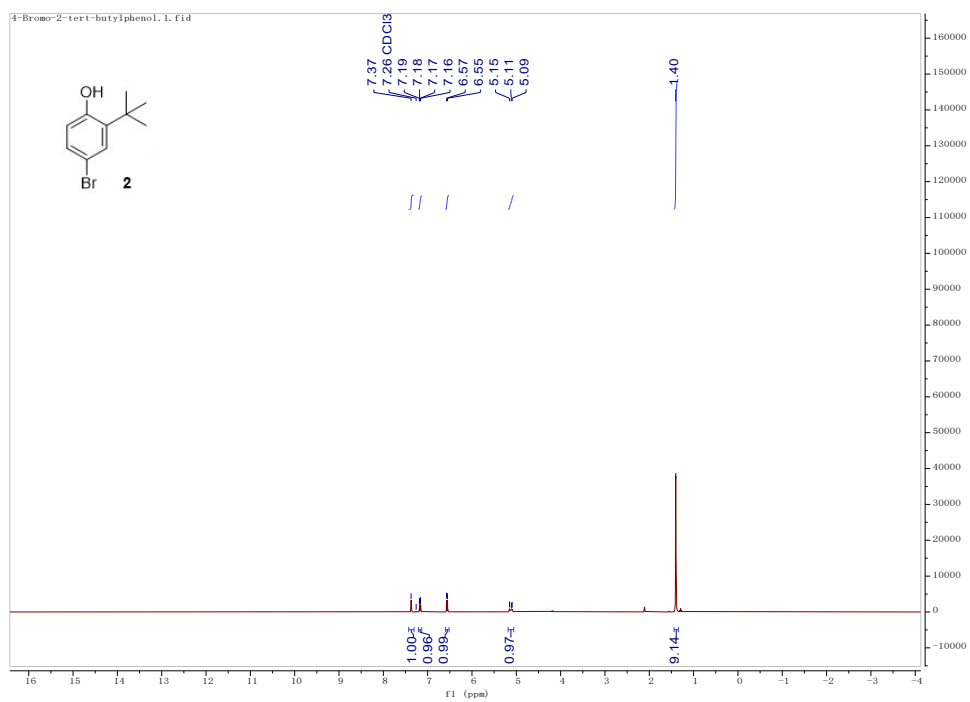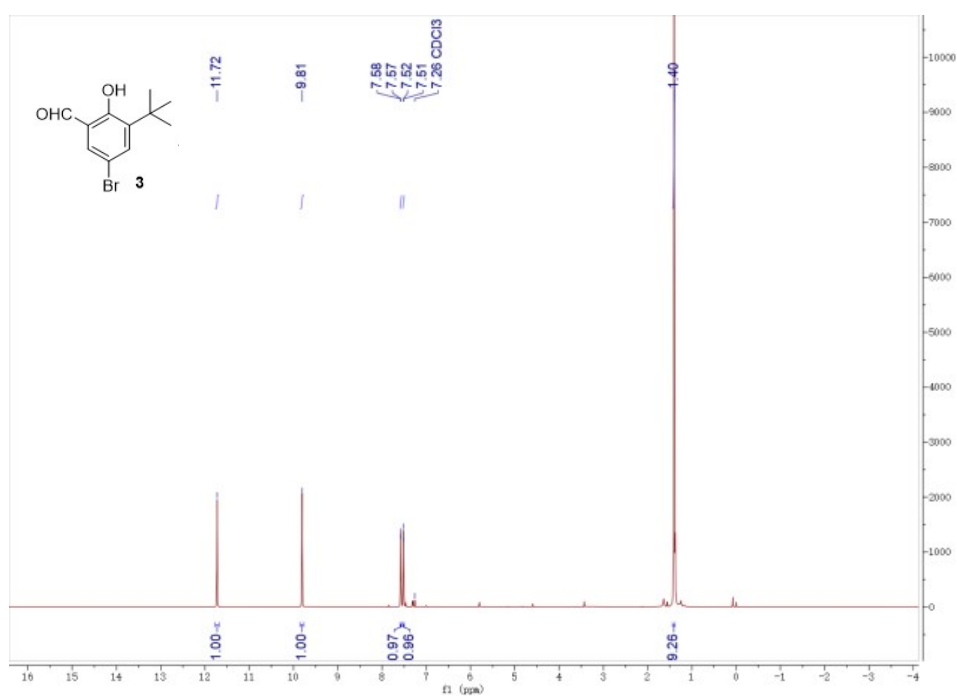



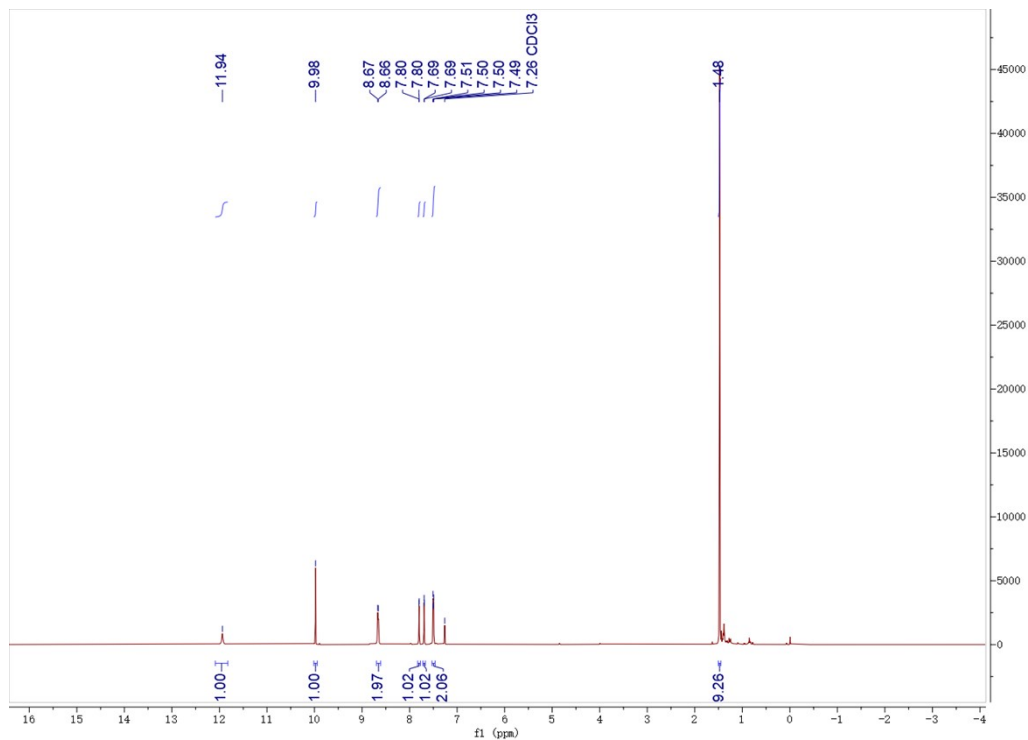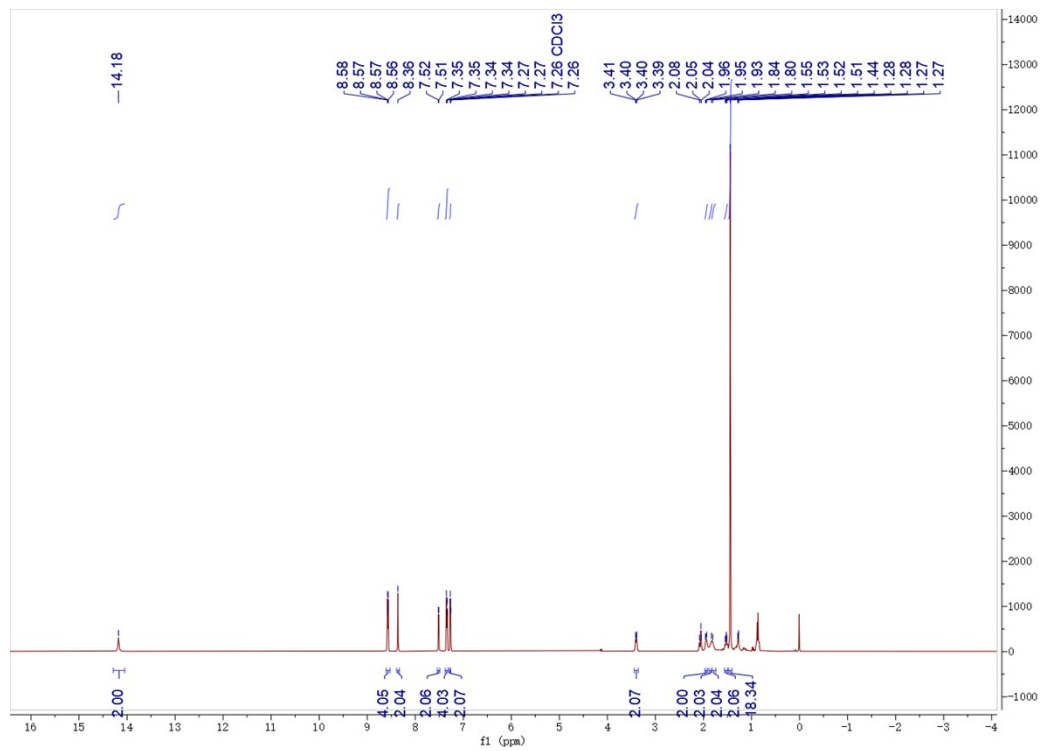

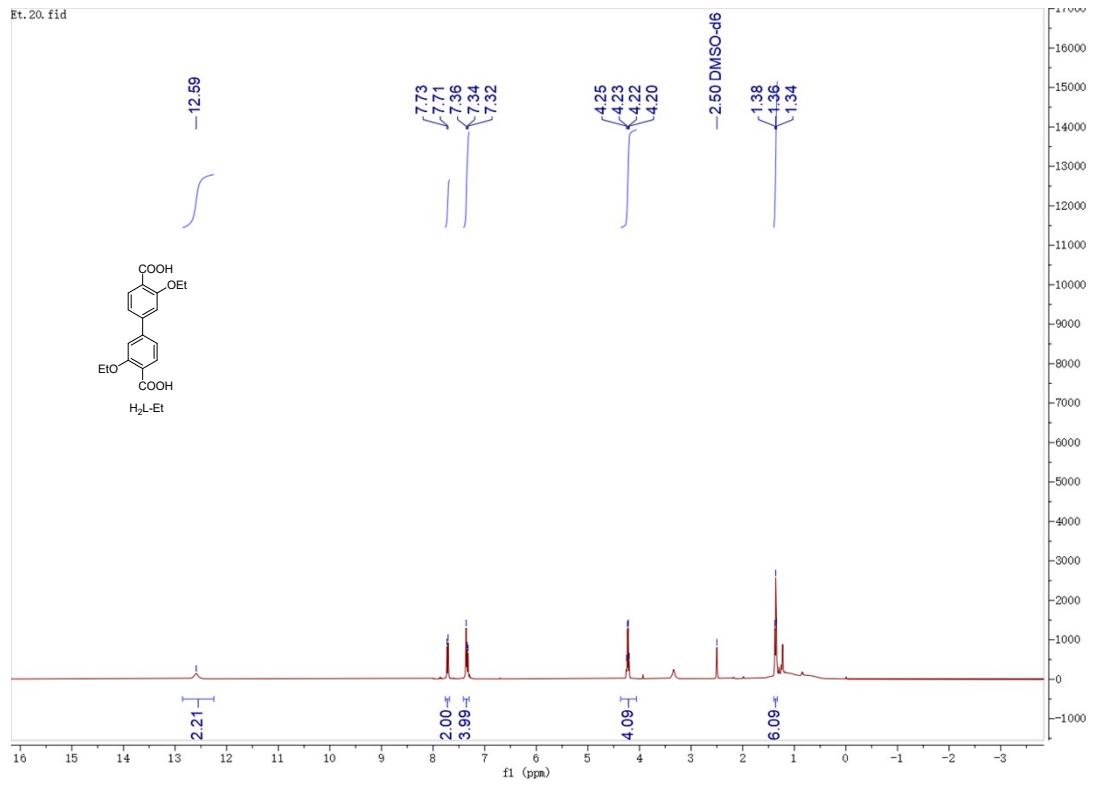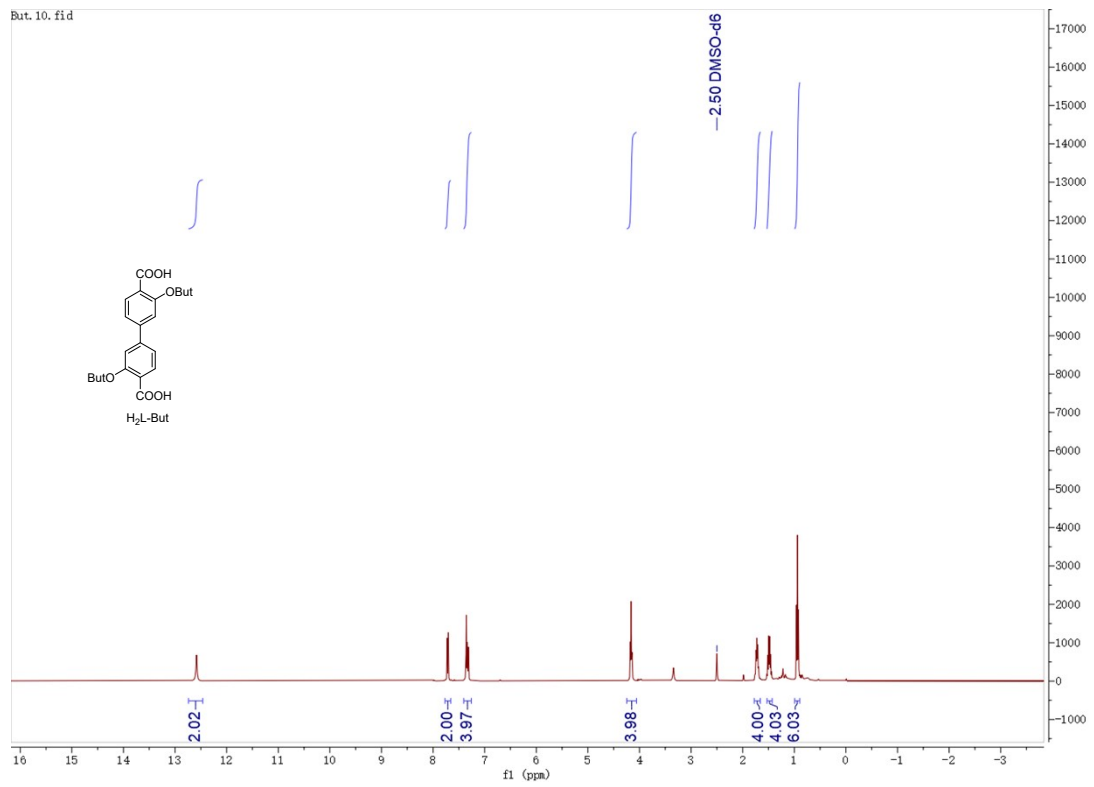

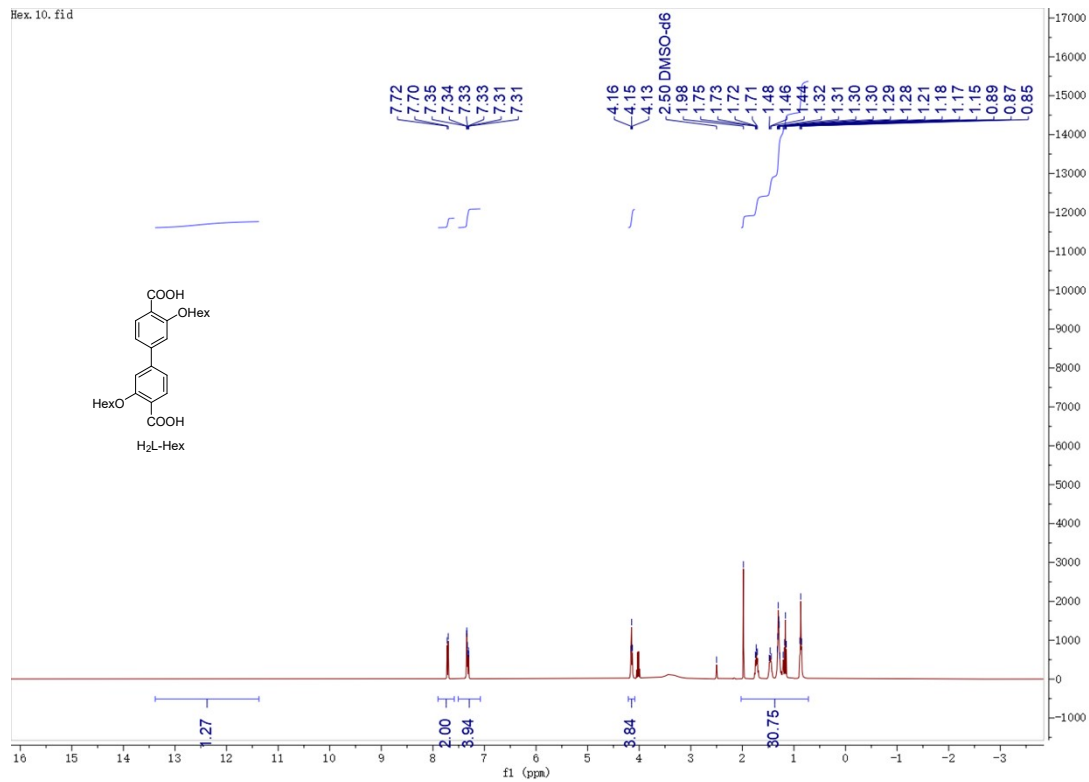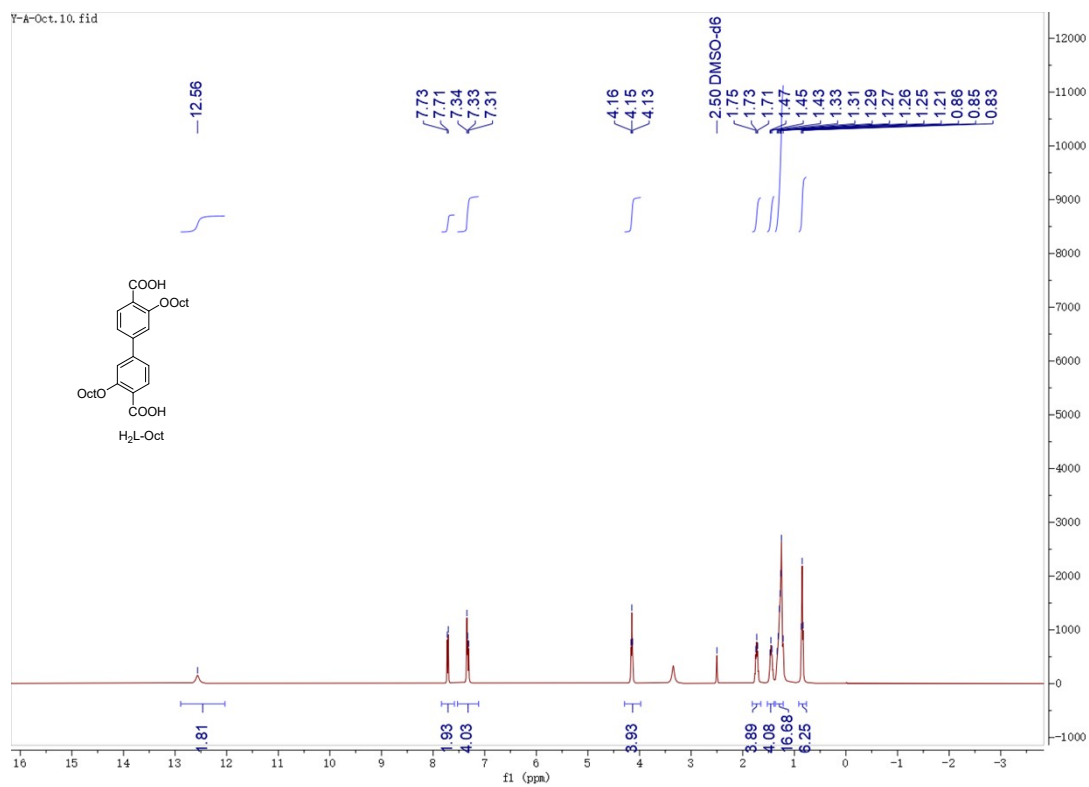

## SI-15 References

- 1 A. B. Williams, P. T. Weiser, R. N. Hanson, J. R. Gunther and J. A. Katzenellenbogen, Synthesis of biphenyl proteomimetics as estrogen receptor- $\alpha$  coactivator binding inhibitors, *Org. Lett.*, 2009, **11**, 5370-5373.
- 2 Y. Peng, C. Zhu and Y. Cui, Synthesis, structure and property of one porous Zn(salen)-based metal-metallosalen framework, *Sci. China Chem.*, 2014, **57**, 107–113.
- 3 J. Xu, Y. Zhang, J. Zhang, Y. Li, B. Li, H. Qiu, P. Zhang and S. Yin, Constructing a triangular metallacycle with salen–Al and its application to a catalytic cyanosilylation reaction, *Chem. Commun.*, 2021, **57**, 10399-10402.
- 4 N.-X. Zhu, Z.-W. Wei, C.-X. Chen, D. Wang, C.-C. Cao, Q.-F. Qiu, J.-J. Jiang, H.-P. Wang and C.-Y. Su, Self-generation of surface roughness by low-surface-energy alkyl chains for highly stable superhydrophobic/superoleophilic MOFs with multiple functionalities, *Angew. Chem. Int. Ed.*, 2019, **58**, 17033-17040.
